# Supplementary material for: Versatile assembly of p-carboxylatocalix[4]arene-O-alkyl ethers
Source: Royal Society of Chemistry journal article supplement (doi:10.1039/b914133b), 2009-10-29
Supplement: b914133b.pdf [file b914133b.pdf]

## Supplementary Information

In order to confirm the bulk properties of the crystals, two additional unit cells were collected for both **8·Py** and **9·Py**. These are listed below, along with the original unit cell dimensions for full data collections.

### Original unit cell from the crystal data for **8·Py**:

$a = 12.2237(6)$ ,  $b = 22.4428(11)$ ,  $c = 24.2799(12)$  Å,  $\alpha = 64.188(3)$ ,  $\beta = 89.399(3)$ ,  $\gamma = 88.268(3)^\circ$

Additional unit cell 1:

$a = 12.20$ ,  $b = 23.05$ ,  $c = 24.61$  Å,  $\alpha = 64.34$ ,  $\beta = 89.81$ ,  $\gamma = 88.99^\circ$

Additional unit cell 2:

$a = 12.38$ ,  $b = 22.73$ ,  $c = 24.42$  Å,  $\alpha = 63.96$ ,  $\beta = 89.50$ ,  $\gamma = 88.37^\circ$

### Original unit cell from the crystal data for **9·Py**:

$a = 12.236(2)$ ,  $b = 13.141(3)$ ,  $c = 22.319(5)$  Å,  $\alpha = 92.18(3)$ ,  $\beta = 100.82(3)$ ,  $\gamma = 99.60(3)^\circ$ .

Additional unit cell 1:

$a = 12.25$ ,  $b = 13.24$ ,  $c = 22.40$  Å,  $\alpha = 92.07$ ,  $\beta = 100.73$ ,  $\gamma = 99.67^\circ$ .

Additional unit cell 2:

$a = 12.25$ ,  $b = 13.22$ ,  $c = 22.38$  Å,  $\alpha = 92.18$ ,  $\beta = 100.91$ ,  $\gamma = 99.47^\circ$ .
